# Supplementary material for: Genuine high-order interactions in brain networks and neurodegeneration
Source: PubMed Central journal article supplement — Neurobiol Dis. Author manuscript; Available in PMC 2024 Jun 24. (PMC11195446; doi:10.1016/j.nbd.2022.105918), 2022-11-12
Supplement: NIHMS1996712-supplement-1.pdf [file NIHMS1996712-supplement-1.pdf]

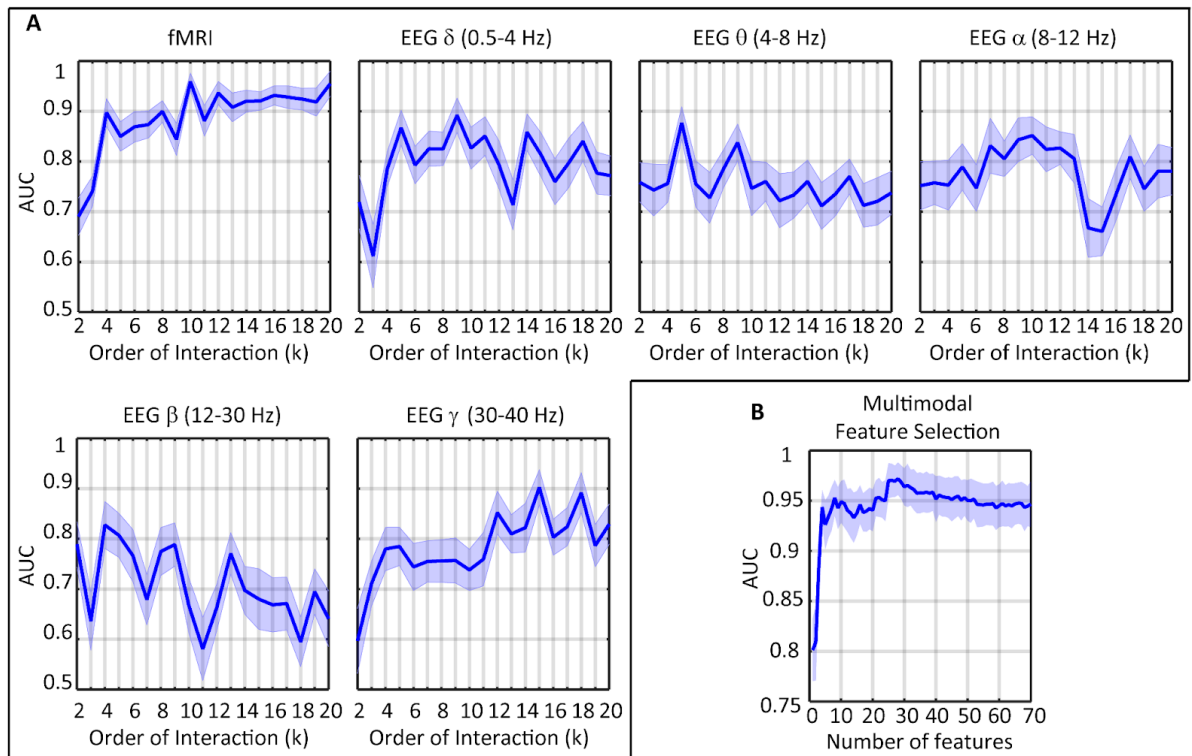

**Supplementary Figure 1.** HOFC yields high classification performance between bvFTD vs AD for unimodal **(A)** and multimodal recordings **(B)**. fMRI: functional magnetic resonance imaging. EEG: electroencephalogram. bvFTD; behavioral variant frontotemporal dementia; AD: Alzheimer’s disease; AUC: Area under the receiver operating characteristic curve.
