# Supplementary material for: Genuine high-order interactions in brain networks and neurodegeneration
Source: PubMed Central journal article supplement — Neurobiol Dis. Author manuscript; Available in PMC 2024 Jun 24. (PMC11195446; doi:10.1016/j.nbd.2022.105918), 2022-11-12
Supplement: NIHMS1996712-supplement-3.pdf [file NIHMS1996712-supplement-3.pdf]

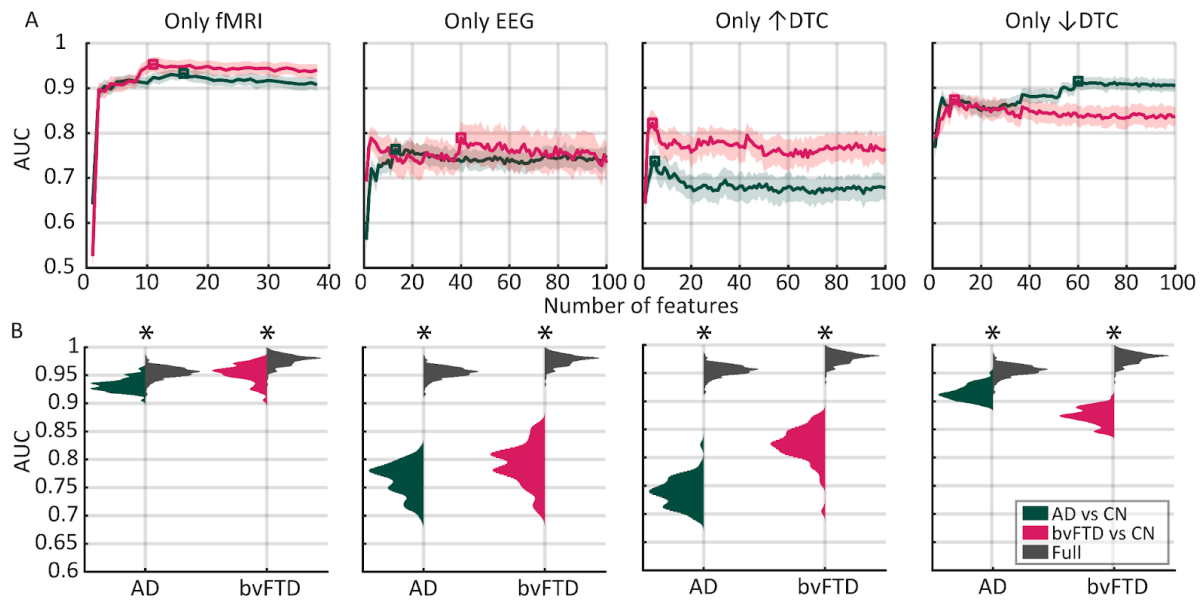

**Supplementary Figure 2.** Multimodal alternatives to the full set of features. **A)** Classification performance vs the number of features. Solid lines and shaded areas represent the average and standard deviation, respectively. **B)** Distributions of the AUC values associated with the squares in **A**. 60 independent random splits were used for cross-validation. The highest classification performance was obtained with the full set of multimodal features, followed by fMRI, only DTC decrease, only DTC increase and only EEG. Asterisks denote Mann-Whitney  $p$ -value  $< 10^{-6}$ . fMRI: functional magnetic resonance imaging. EEG: electroencephalogram; bvFTD: behavioral variant of frontotemporal dementia; AD: Alzheimer’s disease; CN: healthy controls group; DTC: dual total correlation; AUC: Area under the receiver operating characteristic curve; ↑: Increase. ↓: decrease.
