# Supplementary material for: Genuine high-order interactions in brain networks and neurodegeneration
Source: PubMed Central journal article supplement — Neurobiol Dis. Author manuscript; Available in PMC 2024 Jun 24. (PMC11195446; doi:10.1016/j.nbd.2022.105918), 2022-11-12
Supplement: NIHMS1996712-supplement-4.pdf [file NIHMS1996712-supplement-4.pdf]

**Table S1.** Atrophy results in in bvFTD patients

| Region             | Peak's<br><i>t</i> value | MNI coordinates |       |       | Cluster<br>size |
|--------------------|--------------------------|-----------------|-------|-------|-----------------|
|                    |                          | x               | y     | z     |                 |
| L Frontal Inf Tri  | 5.44                     | -36             | 25,5  | 15    | 1142            |
| L Frontal Inf Oper | 4.06                     | -36             | 16,5  | 16.5  |                 |
| L Frontal Inf Tri  | 3.98                     | -34.5           | 21    | 28.5  |                 |
| L Temporal Mid     | 4.97                     | -49.5           | -30   | -15   | 992             |
| L Temporal Inf     | 4.13                     | -48             | -13,5 | -25.5 |                 |
| L Temporal Inf     | 3.85                     | -46.5           | -43,5 | -13.5 |                 |
| R Temporal Mid     | 4.54                     | 51              | -33   | -9    | 4542            |
| R Temporal Pole    | 4.32                     | 45              | 7,5   | -30   |                 |
| R Temporal Inf     | 4.23                     | 51              | -16,5 | -19.5 |                 |
| R Frontal Inf Oper | 4.50                     | 30              | 12    | 33    | 306             |
| R Frontal Sup      | 4.06                     | 25.5            | -10,5 | 60    | 240             |
| L Insula           | 3.66                     | -33             | 24    | 10.5  |                 |
| L Frontal Inf Orb  | 3.51                     | -33             | 34.5  | -9    |                 |
| R Postcentral      | 3.90                     | 39              | -33   | 49,5  | 415             |

Voxel-based morphometry results showing regions with significant grey matter loss in bvFTD patients compared to CN matched in sex, age, and years of education. Results are cluster-corrected for multiple comparisons using AlphaSim with an alpha level of  $p < 0.05$  (extent threshold = 182). L: left, R: right.
