# Supplementary material for: Genuine high-order interactions in brain networks and neurodegeneration
Source: PubMed Central journal article supplement — Neurobiol Dis. Author manuscript; Available in PMC 2024 Jun 24. (PMC11195446; doi:10.1016/j.nbd.2022.105918), 2022-11-12
Supplement: NIHMS1996712-supplement-5.pdf [file NIHMS1996712-supplement-5.pdf]

**Table S2.** Atrophy results in AD patients

| Region             | Peak's<br><i>t</i> value | MNI coordinates |       |       | Cluster<br>size |
|--------------------|--------------------------|-----------------|-------|-------|-----------------|
|                    |                          | x               | y     | z     |                 |
| L Amygdala         | 6.50                     | -24             | -1,5  | -19.5 | 49484           |
| R Amygdala         | 6.44                     | 22.5            | -4.5  | -16.5 |                 |
| R Angular          | 5.13                     | 39              | -63   | 28.5  | 4836            |
| R Temporal Mid     | 4.66                     | 52.5            | -33   | -12   |                 |
| L Parietal Inf     | 4.60                     | -45             | -33   | 40.5  | 1334            |
| L Angular          | 3.61                     | -36             | -61.5 | 33    |                 |
| L Temporal Mid     | 4.18                     | -54             | -60   | 21    | 400             |
| R Temporal Inf     | 4.12                     | 42              | -60   | -6    | 657             |
| R Occipital Mid    | 3.63                     | 39              | -70.5 | 0     |                 |
| R Precuneus        | 4.10                     | 9               | -49.5 | 25.5  | 987             |
| L Cingulum Mid     | 3.60                     | -9              | -39   | 34.5  |                 |
| R Precuneus        | 4.03                     | 6               | -63   | 58.5  | 303             |
| R Parietal Sup     | 3.56                     | 18              | -63   | 60    |                 |
| R Frontal Sup      | 3.69                     | 21              | 42    | 39    | 183             |
| R Precuneus        | 3.63                     | 1.5             | -61.5 | 39    | 195             |
| R Frontal Inf Oper | 3.63                     | 39              | 10.5  | 31.5  | 308             |
| R Frontal Mid      | 3.46                     | 33              | 21    | 39    |                 |

Voxel-based morphometry results showing regions with significant grey matter loss in AD patients compared to CN matched in sex, age, and years of education. Results are cluster-corrected for multiple comparisons using AlphaSim with an alpha level of  $p < 0.05$  (extent threshold = 172). L: left; R: right.
