# Supplementary material for: Genuine high-order interactions in brain networks and neurodegeneration
Source: PubMed Central journal article supplement — Neurobiol Dis. Author manuscript; Available in PMC 2024 Jun 24. (PMC11195446; doi:10.1016/j.nbd.2022.105918), 2022-11-12
Supplement: NIHMS1996712-supplement-6.pdf [file NIHMS1996712-supplement-6.pdf]

**Table S3.** Demographic, cognitive, and functionality data of the fMRI subsample

|                                            | <b>CN</b><br>( <i>n</i> = 95) | <b>bvFTD</b><br>( <i>n</i> = 22) | <b>AD</b><br>( <i>n</i> = 43) | <b>Stats</b>              | <b>Post-hoc comparisons</b>                                           |
|--------------------------------------------|-------------------------------|----------------------------------|-------------------------------|---------------------------|-----------------------------------------------------------------------|
| <i>Demographics</i>                        |                               |                                  |                               |                           |                                                                       |
| Sex (M:F)                                  | 44:51                         | 16:6                             | 17:26                         | $\chi^2 = 6.72; p = 0.03$ | CN- bvFTD: $p = 0.04$<br>CN-AD: $p = 0.57$<br>bvFTD-AD: $p = 0.02$    |
| Age                                        | 67.42<br>(8.36)               | 66.27<br>(11.28)                 | 76.46<br>(7.81)               | $F = 18.02; p < 0.001$    | CN- bvFTD: $p = 0.57$<br>CN-AD: $p < 0.001$<br>bvFTD-AD: $p < 0.001$  |
| Years of education                         | 14.24<br>(4.33)               | 13.90<br>(4.80)                  | 10.44<br>(5.03)               | $F = 10.41; p < 0.001$    | CN- bvFTD: $p = 0.75$<br>CN-AD: $p < 0.001$<br>bvFTD-AD: $p = 0.004$  |
| <i>Cognitive and functional assessment</i> |                               |                                  |                               |                           |                                                                       |
| MoCA total score                           | 27.07<br>(2.83)               | 20.72<br>(5.23)                  | 15.53<br>(4.26)               | $F = 125.4; p < 0.001$    | CN- bvFTD: $p < 0.001$<br>CN-AD: $p < 0.001$<br>bvFTD-AD: $p < 0.001$ |
| IFS total score                            | 23.94<br>(2.75)               | 18.13<br>(5.36)                  | 13.41<br>(4.54)               | $F = 93.12; p < 0.001$    | CN- bvFTD: $p < 0.001$<br>CN-AD: $p < 0.001$<br>bvFTD-AD: $p < 0.001$ |
| FAQ total score                            | ---                           | 7.41<br>(6.84)                   | 9.71<br>(7.20)*               | $F = 1.24; p = 0.26$      | ---                                                                   |

Data are presented as mean (SD), except for sex. Categorical variables were analyzed with Pearson's chi-squared ( $\chi^2$ ) test. Continuous variables were analyzed through ANOVAs and post-hoc pairwise comparisons. The alpha level was set at  $p < 0.05$ . AD: Alzheimer's disease, bvFTD: behavioral variant of frontotemporal dementia, CN: healthy controls, FAQ: Pfeffer's Functional Assessment Questionnaire, IFS: INECO Frontal Screening, MoCA: Montreal Cognitive Assessment. \*Mean score above the cut-off of 8/9 (sensitivity = 87, specificity = 82) for functional impairment according to the Spanish version of the questionnaire (Cruz-Orduña et al., 2011).
