# Supplementary material for: Genuine high-order interactions in brain networks and neurodegeneration
Source: PubMed Central journal article supplement — Neurobiol Dis. Author manuscript; Available in PMC 2024 Jun 24. (PMC11195446; doi:10.1016/j.nbd.2022.105918), 2022-11-12
Supplement: NIHMS1996712-supplement-7.pdf [file NIHMS1996712-supplement-7.pdf]

**Table S4.** Demographic, cognitive, and functionality data of the EEG subsample

|                                            | <b>CN</b><br>( <i>n</i> = 46) | <b>bvFTD</b><br>( <i>n</i> = 18) | <b>AD</b><br>( <i>n</i> = 31) | <b>Stats</b>                    | <b>post-hoc comparisons</b>                                           |
|--------------------------------------------|-------------------------------|----------------------------------|-------------------------------|---------------------------------|-----------------------------------------------------------------------|
| <i>Demographics</i>                        |                               |                                  |                               |                                 |                                                                       |
| Sex (M:F)                                  | 17:29                         | 13:5                             | 14:17                         | $\chi^2 = 6.49$ ;<br>$p = 0.03$ | CN- bvFTD: $p = 0.02$<br>CN-AD: $p = 0.62$<br>bvFTD-AD: $p = 0.12$    |
| Age                                        | 71.06<br>(7.31)               | 68.22<br>(10.14)                 | 75.74<br>(7.59)               | $F = 5.71$ ; $p = 0.004$        | CN- bvFTD: $p = 0.2$<br>CN-AD: $p = 0.01$<br>bvFTD-AD: $p = 0.002$    |
| Years of education                         | 14.69<br>(4.07)               | 15.38<br>(4.93)                  | 9.87<br>(5.02)                | $F = 12.76$ ;<br>$p < 0.001$    | CN- bvFTD: $p = 0.58$<br>CN-AD: $p < 0.001$<br>bvFTD-AD: $p = 0.0001$ |
| <i>Cognitive and functional assessment</i> |                               |                                  |                               |                                 |                                                                       |
| MoCA total score                           | 25.41<br>(3.14)               | 22.16<br>(4.56)                  | 16.89<br>(4.14)               | $F = 38.98$ ;<br>$p < 0.001$    | CN- bvFTD: $p = 0.004$<br>CN-AD: $p < 0.001$<br>bvFTD-AD: $p < 0.001$ |
| IFS total score                            | 23.10<br>(2.03)               | 19.77<br>(4.92)                  | 14.48<br>(4.28)               | $F = 38.25$ ;<br>$p < 0.001$    | CN- bvFTD: $p = 0.004$<br>CN-AD: $p < 0.001$<br>bvFTD-AD: $p < 0.001$ |
| FAQ total score                            | ---                           | 6<br>(6.04)                      | 9.91<br>(6.26)*               | $F = 3.85$ ;<br>$p = 0.05$      | ---                                                                   |

Data are presented as mean (*SD*), except for sex. Categorical variables were analyzed with Pearson's chi-squared ( $\chi^2$ ) test. Continuous variables were analyzed through ANOVAs and post-hoc pairwise comparisons. The alpha level was set at  $p < 0.05$ . AD: Alzheimer's disease, bvFTD: behavioral variant of frontotemporal dementia, CN: healthy controls, FAQ: Pfeffer's Functional Assessment Questionnaire, IFS: INECO Frontal Screening, MoCA: Montreal Cognitive Assessment. \*Mean score above the cut-off of 8/9 (sensitivity = 87, specificity = 82) for functional impairment according to the Spanish version of the questionnaire (Cruz-Orduña et al., 2011).
