# Supplementary material for: Genuine high-order interactions in brain networks and neurodegeneration
Source: PubMed Central journal article supplement — Neurobiol Dis. Author manuscript; Available in PMC 2024 Jun 24. (PMC11195446; doi:10.1016/j.nbd.2022.105918), 2022-11-12
Supplement: NIHMS1996712-supplement-8.pdf [file NIHMS1996712-supplement-8.pdf]

**Table S5.** Cognitive and functionality assessment for the full population

| <i>Cognitive and functional assessment</i> |                               |                                  |                               |                        |                                                                       |
|--------------------------------------------|-------------------------------|----------------------------------|-------------------------------|------------------------|-----------------------------------------------------------------------|
|                                            | <b>CN</b><br>( <i>n</i> = 99) | <b>bvFTD</b><br>( <i>n</i> = 25) | <b>AD</b><br>( <i>n</i> = 49) | <b>Stats</b>           |                                                                       |
| MoCA total score                           | 26.96<br>(22.87)              | 21.23<br>(5.01)                  | 15.93<br>(4.28)               | $F = 123.6; p < 0.001$ | CN- bvFTD: $p < 0.001$<br>CN-AD: $p < 0.001$<br>bvFTD-AD: $p < 0.001$ |
| IFS total score                            | 18.78<br>(5.28)               | 23.83<br>(2.77)                  | 13.73<br>(4.52)               | $F = 92.02; p < 0.001$ | CN- bvFTD: $p < 0.001$<br>CN-AD: $p < 0.001$<br>bvFTD-AD: $p < 0.001$ |
| FAQ total score                            | ---                           | 7.05<br>(6.66)                   | 9.95<br>(7.20)*               | $F = 2.28; p = 0.13$   | ---                                                                   |

Continuous variables were analyzed through ANOVAs and post-hoc pairwise comparisons. The alpha level was set at  $p < 0.05$ . AD: Alzheimer's disease, bvFTD: behavioral variant of frontotemporal dementia, CN: healthy controls, FAQ: Pfeffer's Functional Assessment Questionnaire, IFS: INECO Frontal Screening, MoCA: Montreal Cognitive Assessment. \*Mean score above the cut-off of 8/9 (sensitivity = 87, specificity = 82) for functional impairment according to the Spanish version of the questionnaire (Cruz-Orduña et al., 2011).
