# Supplementary material for: Genuine high-order interactions in brain networks and neurodegeneration
Source: PubMed Central journal article supplement — Neurobiol Dis. Author manuscript; Available in PMC 2024 Jun 24. (PMC11195446; doi:10.1016/j.nbd.2022.105918), 2022-11-12
Supplement: NIHMS1996712-supplement-9.pdf [file NIHMS1996712-supplement-9.pdf]

**Table S6.** Head movements parameters for fMRI subsample

| Variable    | bvFTD       | CN          | AD          | Statistics (all groups) |
|-------------|-------------|-------------|-------------|-------------------------|
| Translation | 0.9 (0.05)  | 0.09 (0.05) | 0.09 (0.05) | $F=1.04$<br>$p=0.38$    |
| Rotation    | 0.06 (0.03) | 0.04 (0.05) | 0.06 (0.03) | $F=0.94$<br>$p=0.42$    |

Continuous variables were analyzed through ANOVAs. Results presented as mean and standard deviation (in parenthesis). AD: Alzheimer's disease; bvFTD: behavioral variant frontotemporal dementia; CN: healthy controls.
