# Supplementary material for: Genuine high-order interactions in brain networks and neurodegeneration
Source: PubMed Central journal article supplement — Neurobiol Dis. Author manuscript; Available in PMC 2024 Jun 24. (PMC11195446; doi:10.1016/j.nbd.2022.105918), 2022-11-12
Supplement: NIHMS1996712-supplement-10.pdf [file NIHMS1996712-supplement-10.pdf]

**Table S7.** Eye artifacts for the EEG subsample

| Variable      | bvFTD        | CN           | AD           | Statistics (all groups) |
|---------------|--------------|--------------|--------------|-------------------------|
| Eye artifacts | 2.471 (1.18) | 1.634 (1.68) | 1.667 (1.37) | $F=2.10$<br>$p=0.129$   |

Continuous variables were analyzed through ANOVAs. Results presented as mean and standard deviation (in parenthesis). AD: Alzheimer's disease; bvFTD: behavioral variant frontotemporal dementia; CN: healthy controls.
